# Supplementary material for: SolveSAPHE-r2 (v2.0.1): revisiting and extending the Solver Suite for Alkalinity-PH Equations for usage with CO 2 , HCO 3 − or CO 3 2− input data
Source: Copernicus journal article supplement (doi:10.5194/gmd-14-4225-2021), 2021-07-06
Supplement: Supplementary file [file gmd-14-4225-2021-supplement-title-page.pdf › gmd-14-4225-2021-supplement-title-page.pdf]

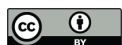

## *Supplement of*

# **SolveSAPHE-r2 (v2.0.1): revisiting and extending the Solver Suite for Alkalinity-PH Equations for usage with CO<sub>2</sub>, HCO<sub>3</sub><sup>-</sup> or CO<sub>3</sub><sup>2-</sup> input data**

**Guy Munhoven**

*Correspondence to:* Guy Munhoven ([guy.munhoven@uliege.be](mailto:guy.munhoven@uliege.be))

- [gmd-14-4225-2021-supplement-title-page.pdf](#)
- [AdditionalResults.pdf](#)
- [MathematTechDetails.pdf](#)
- [readme.txt](#)
- [sdt\\_iconstraints.f90](#)
- [secondderivterms.f90](#)
- [solvesaphe2\\_0\\_1.tar.gz](#)

The copyright of individual parts of the supplement might differ from the article licence.
